# Supplementary material for: Upper Gastrointestinal Bleeding in Adults Under Veno-Arterial Extracorporeal Membrane Oxygenation: A Single-Center Retrospective Study
Source: Research Square preprint supplement (doi:10.21203/rs.3.rs-494685/v1), 2021-05-17
Supplement: Supplementary file 1 [file 33058b967b318cdc9442fa52.docx]

**Supplemental data: Table 1** Univariate analysis in a cause-specific model for associated risks of UGIB

|  | **Variable** |  | **UGIB** |  |  | **Death** | |
| --- | --- | --- | --- | --- | --- | --- | --- |
|  |  | **HR** | **HRIC** | **p value** | **HR** | **HRIC** | **p value** |
|  |  |  |  |  |  |  |  |
|  | **Baseline characteristics** |  |  |  |  |  |  |
|  | Age > 60 years | 1.51 | [0.84 ; 2.73] | 0.17 | 1.21 | [0.84 ; 1.73] | 0.30 |
|  | Male | 0.87 | [0.44; 1.73] | 0.69 | 0.94 | [0.62; 1.43] | 0.79 |
|  | BMI > 30 kg/m2 | 2.17 | [1.17; 3.99] | 0.01 | 0.67 | [0.42; 1.07] | 0.09 |
|  | Charlson score > 2 | 1.92 | [0.85; 4.35] | 0.56 | 1.10 | [0.71; 1.7] | 0.41 |
|  | Charlson score = 1 or 2 | 1.45 | [0.46; 4.59] | 0.53 | 0.83 | [0.4; 1.72] | 0.62 |
|  | Charlson score = 0 | 1 |  | 0.28 | 1 |  | 0.68 |
|  | Myocardial infarction | 1.18 | [0.64; 2.17] | 0.60 | 0.90 | [0.6; 1.33] | 0.59 |
|  | Peripheral vascular disease | 1.02 | [0.43; 2.42] | 0.96 | 0.81 | [0.44; 1.46] | 0.48 |
|  | History of stroke | 1.52 | [0.64; 3.61] | 0.35 | 1.92 | [1.22; 3.01] | <.01 |
|  | Chronic pulmonary disease | 0.86 | [0.41; 1.8] | 0.69 | 0.86 | [0.53; 1.38] | 0.52 |
|  | Peptic ulcer | 1.47 | [0.35; 6.19] | 0.60 | 1.78 | [0.93; 3.41] | 0.08 |
|  | Chronic liver | 3.07 | [0.93; 10.13] | 0.06 | 1.08 | [0.4; 2.93] | 0.88 |
|  | Diabetes | 1.84 | [1.02; 3.33] | 0.04 | 0.87 | [0.58; 1.3] | 0.49 |
|  | Chronic renal disease | 1.35 | [0.7; 2.63] | 0.37 | 0.92 | [0.58; 1.45] | 0.72 |
|  | History of cancer | 1.82 | [0.24; 13.75] | 0.56 | 3.24 | [1.62; 6.47] | <.01 |
|  | Hypertension | 0.90 | [0.5; 1.65] | 0.74 | 1.15 | [0.8; 1.65] | 0.45 |
|  | Smoking | 1.22 | [0.6; 2.47] | 0.58 | 0.93 | [0.58; 1.5] | 0.77 |
|  | Dyslipidemia | 1.49 | [0.82; 2.69] | 0.19 | 0.84 | [0.57; 1.25] | 0.40 |
|  | Alcoholism | 1.91 | [0.67; 5.43] | 0.22 | 1.19 | [0.6; 2.36] | 0.61 |
|  | Antiplatelet therapy before admission | 1.20 | [0.66 ; 2.2] | 0.55 | 0.80 | [0.56 ; 1.15] | 0.22 |
|  | Dual antiplatelet therapy in ICU | 2.51 | [1.08 ; 5.86] | 0.03 | 1.56 | [0.84 ; 1.73] | 0.30 |
|  | **Cannulation characteristics** |  |  |  |  |  |  |
|  | Medical indication for ECMO | 1.56 | [0.90 ;2.94] | 0.16 | 1.96 | [1.31; 2.94] | <.01 |
|  | ECPR | 2.22 | [1.03; 4.81] | 0.04 | 2.82 | [1.84; 4.33] | <.01 |


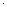

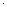

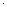

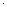

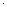

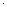


| Renal SOFA > 2 | 1.72 | [0.9; 3.28] | 0.10 | 1.46 | [0.97; 2.19] | 0.07 |
| --- | --- | --- | --- | --- | --- | --- |
| SAVE score V | 1.82 | [0.89; 3.71] | 0.50 | 1.10 | [0.73; 1.65] | 0.10 |
| SAVE score IV | 1.42 | [0.63; 3.19] | 0.39 | 0.74 | [0.46; 1.21] | 0.23 |
| SAVE score I-III | 1 |  | 0.25 | 1 |  | 0.26 |
| Continuous RRT | 0.97 | [0.46; 2.02] | 0.93 | 1.05 | [0.69; 1.6] | 0.82 |
| Intermittent RRT | 1.36 | [0.68; 2.73] | 1.36 | 0.96 | [0.61; 1.51] | 0.87 |
| No RRT | 1 |  | 0.59 | 1 |  | 0.94 |

Results are presented as Hazard ratio [95% confidence interval]

UGIB: Upper Gastrointestinal Bleeding; SAPS: Simplified Acute Physiology Score, ICU: Intensive Care Unit; QT:

Quick Time; APTT: Activated Partial Thromboplastin Time; BMI: Body Mass Index; SOFA: Sequential Organ Failure

Assessment; RRT: Renal Replacement Therapy

**Supplemental data: Table 2** Transfusion characteristics 24h before and on the day of upper gastrointestinal endoscopy (n = 75)


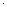


| Number of RBC units transfused 24h before UGE |  | 0 [0; 2] | |
| --- | --- | --- | --- |
| Number of RBC units transfused on the day of UGE | 2 [0; 3] | | |
| Hb (g/dL) 24 hours before UGE, | 8.3 | | [7.5; 9.1] |
| Hb (g/dL) on the day of UGE, | 8 | | [7.3; 9] |
| Last QT (%) before UGE, | 72 | | [57; 86] |
| Last APTT before UGE, | 1.6 [1.2; 2] | | |
| Last platelet count (G/L) before UGE | 102 | | [59; 170] |

Results are expressed as n (%) or median [interquartile range]

UGE: Upper Gastrointestinal Endoscopy; RBC: Red Blood Cell; Hb: Hemoglobin; QT: Quick Time; APTT: Activated Partial Thromboplastin Time

**Supplemental data : Table 3** Diagnostic performance of pre-UGE characteristics for endoscopic lesions

| **Characteristics** |  | **Specificity (%)** |  | **Sensitivity (%)** |  | **AUC** |  | **AUC CI 95%** |
| --- | --- | --- | --- | --- | --- | --- | --- | --- |
|  |  |  |  |  |  |  |  |  |
| Hemoglobin < 8g/dL, 24h before UGE | 41 | 69 | 0.56 | [0.43; 0.70] |
| QT > 70% before UGE | 70 | | 46 | | 0.59 | | [0.45; 0.73] | |
| APTT > 1.5 before UGE | 63 | | 44 | | 0.61 | | [0.47; 0.75] | |
| Platelets > 150 G/L before UGE | 74 | | 46 | | 0.61 | | [0.48; 0.74] | |
| 3 RBC units transfused before UGE | 93 | | 8 | | 0.46 | | [0.34; 0.58] | |
| Melena | 96 | | 31 | | 0.64 | | [0.56; 0.71] | |
| Hematemesis | 89 | | 27 | | 0.58 | | [0.49; 0.67] | |
| Hematochezia | 81 | | 4 | | 0.43 | | [0.35; 0.51] | |
| Acute anemia | 59 | | 25 | | 0.42 | | [0.31; 0.53] | |

AUC: area under curve; UGE: Upper Gastrointestinal Endoscopy; QT: Quick Time; APTT: Activated Partial Thromboplastin Time; RBC: Red Blood Cell
